# Supplementary material for: Ordered mesoporous silicon carbide (OM-SiC) via polymer precursor nanocasting
Source: Royal Society of Chemistry journal article supplement (doi:10.1039/b603284b), 2006-01-01
Supplement: b603284b.pdf [file b603284b.pdf]

## Supporting Information:

### Ordered mesoporous silicon carbide (OM-SiC) via polymer precursor nanocasting

Piotr Krawiec, Dorin Geiger, and Stefan Kaskel\*

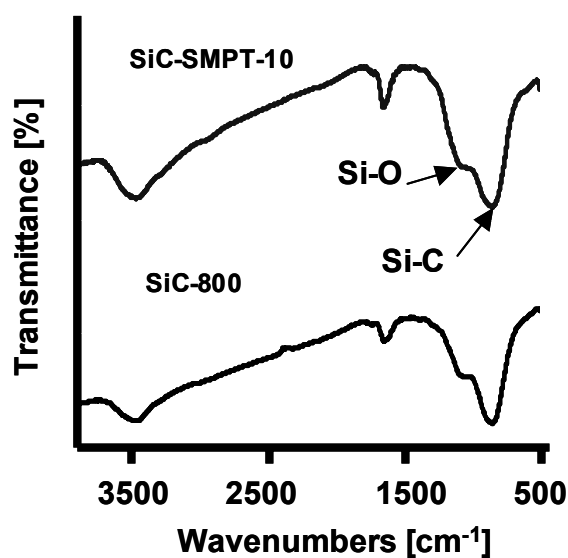

IR spectra of the mesoporous silicon carbide materials SiC-800 and SiC-SMPT-10. The Si-C bonds were detected at 830cm<sup>-1</sup> together with a minor presence Si-O species at 1040cm<sup>-1</sup>.
